# Supplementary material for: Cancer Incidence in Korean Healthcare Workers in Hospitals
Source: MDPI journal article supplement (doi:10.3390/cancers15072045), 2023-03-29
Supplement: s1 [file s1]

Article

# Cancer Incidence in Korean Healthcare Workers in Hospitals

Dong-Wook Lee <sup>1,2</sup>, Hyeonjun Kim <sup>3</sup>, Wanhyung Lee <sup>4</sup>, Woo-Ri Lee <sup>5</sup>, Ki-Bong Yoo <sup>6</sup>, Jun-Hyeok Choi <sup>7</sup>,  
Kyung-Eun Lee <sup>7</sup> and Jin-Ha Yoon <sup>8,\*</sup>

<sup>1</sup> Department of Occupational and Environmental Medicine, Inha University Hospital, Inha University, Incheon 22332, Republic of Korea

<sup>2</sup> Jungbu Korea Occupational Diseases Surveillance Center, Incheon 22332, Republic of Korea

<sup>3</sup> Department of Occupational and Environmental Medicine, Chonnam National University Medical School and Chonnam National University Hwasun Hospital, Jeollanam-do 58128, Republic of Korea

<sup>4</sup> Department of Occupational and Environmental Medicine, Gil Medical Center, Gachon University College of Medicine, Incheon 21654, Republic of Korea

<sup>5</sup> Department of Research and Analysis, National Health Insurance Service Ilsan Hospital, Gyeonggi-do 10444, Republic of Korea

<sup>6</sup> Division of Health Administration, College of Software and Digital Healthcare Convergence, Yonsei University, Gangwon-do 26426, Republic of Korea

<sup>7</sup> Occupational Safety and Health Research Institute, Korea Occupational Safety and Health Agency, Ulsan 44429, Republic of Korea

<sup>8</sup> Department of Occupational and Environmental Medicine, Severance Hospital, Yonsei University College of Medicine, Seoul 03722, Republic of Korea

\* Correspondence: flyinyou@yuhs.ac

## **Table of Contents**

|                                                                                                                                                                                       |          |
|---------------------------------------------------------------------------------------------------------------------------------------------------------------------------------------|----------|
| <b>Supplementary Table S1. Descriptive statistics of the cohort.....</b>                                                                                                              | <b>3</b> |
| <b>Supplementary Table S2. Observed Number of Deaths, Standardized Incidence Ratio and<br/>95% Confidence Interval, Total Workers as the Reference Group (Dynamic cohort).....</b>    | <b>4</b> |
| <b>Supplementary Table S3. Observed Number of Deaths, Standardized Incidence Ratio and<br/>95% Confidence Interval, Public Officials as the Reference Group (Dynamic cohort).....</b> | <b>5</b> |
| <b>Supplementary Table S4. The summary of significant findings in this study.....</b>                                                                                                 | <b>6</b> |

**Supplementary Table S1. Descriptive statistics of the cohort**

| Variable                      | HHCWs              |                    | Total workers      |                    | Public officials   |                    |
|-------------------------------|--------------------|--------------------|--------------------|--------------------|--------------------|--------------------|
|                               | Fixed cohort       | Dynamic cohort     | Fixed cohort       | Dynamic cohort     | Fixed cohort       | Dynamic cohort     |
|                               | n (%)              |
|                               | mean $\pm$ SD      |
| Total                         | 107,646            | 363,847            | 8,317,710          | 11,050,398         | 611,833            | 677,667            |
| Person-years                  |                    |                    |                    |                    |                    |                    |
| Total                         | 905,303            | 2,463,244          | 68,787,462         | 75,474,218         | 4,288,949          | 4,723,339          |
| Average                       | 8.41 ( $\pm$ 0.84) | 6.77 ( $\pm$ 0.97) | 8.27 ( $\pm$ 0.98) | 6.83 ( $\pm$ 0.84) | 7.01 ( $\pm$ 0.28) | 6.97 ( $\pm$ 0.33) |
| Gender                        |                    |                    |                    |                    |                    |                    |
| Male                          | 37,243             | 195,846            | 5,740,042          | 7,362,615          | 300,080            | 338,793            |
| Female                        | 70,403             | 168,001            | 2,577,668          | 3,687,783          | 311,753            | 338,874            |
| Age at end of follow-up (yrs) |                    |                    |                    |                    |                    |                    |
| 25-34                         | 52,469             | 118,604            | 2,866,046          | 3,760,839          | 167,944            | 182,043            |
| 35-44                         | 30,738             | 117,893            | 2,824,660          | 3,622,940          | 208,193            | 222,986            |
| 45-54                         | 17,316             | 89,027             | 1,993,575          | 2,641,425          | 187,779            | 203,699            |
| 55-64                         | 7,123              | 38,323             | 633,429            | 1,025,194          | 47,917             | 68,939             |
| Income                        |                    |                    |                    |                    |                    |                    |
| 1Q (lowest)                   | 21,064             | 188,949            | 1,871,217          | 2,816,275          | 17,789             | 19,886             |
| 2Q                            | 37,648             | 83,645             | 1,924,848          | 2,705,880          | 45,171             | 49,849             |
| 3Q                            | 27,830             | 57,491             | 2,204,875          | 2,758,013          | 194,982            | 210,576            |
| 4Q(highest)                   | 21,104             | 33,762             | 2,316,770          | 2,770,230          | 353,891            | 397,356            |

HHCWs, healthcare workers in hospitals; SD, standard deviation; Q1–4, Quartile 1–4

**Supplementary Table S2. Observed Number of Deaths, Standardized Incidence Ratio and 95% Confidence Interval, Total Workers as the Reference Group**

**(Dynamic cohort)**

| Cancer classification                                       | Male |       |      |             |       | Female |        |      |             |       |
|-------------------------------------------------------------|------|-------|------|-------------|-------|--------|--------|------|-------------|-------|
|                                                             | Obs  | Exp   | SIR  | 95% CI      | P     | Obs    | Exp    | SIR  | 95% CI      | P     |
| All-cause death                                             | 252  | 297.9 | 0.85 | (0.76-0.95) | 0.004 | 281    | 247.5  | 1.14 | (1.00-1.29) | 0.020 |
| [C00-C97] Malignant neoplasm                                | 545  | 600.9 | 0.91 | (0.84-0.98) | 0.011 | 2094   | 1973.2 | 1.06 | (1.02-1.11) | 0.004 |
| [C00-C14] Lip, oral cavity and pharynx                      | 17   | 12.7  | 1.34 | (0.78-2.54) | 0.144 | 19     | 11.6   | 1.64 | (0.93-3.22) | 0.028 |
| [C15-C26] Digestive organs                                  | 288  | 311.0 | 0.93 | (0.83-1.04) | 0.100 | 299    | 286.3  | 1.04 | (0.93-1.18) | 0.234 |
| (C16) Stomach                                               | 109  | 117.1 | 0.93 | (0.78-1.13) | 0.244 | 132    | 119.2  | 1.11 | (0.93-1.34) | 0.131 |
| (C18) Colon                                                 | 51   | 46.6  | 1.09 | (0.82-1.49) | 0.278 | 56     | 61.2   | 0.91 | (0.71-1.20) | 0.279 |
| (C22) Liver and intrahepatic bile ducts                     | 51   | 70.5  | 0.72 | (0.57-0.93) | 0.009 | 30     | 27.4   | 1.10 | (0.76-1.66) | 0.334 |
| (C25) Pancreas                                              | 9    | 14.0  | 0.64 | (0.38-1.17) | 0.109 | 17     | 14.7   | 1.16 | (0.70-2.09) | 0.307 |
| [C30-C39] Respiratory and intrathoracic organs              | 60   | 58.6  | 1.02 | (0.79-1.35) | 0.445 | 76     | 61.0   | 1.25 | (0.97-1.63) | 0.035 |
| (C33-C34) Trachea & Malignant neoplasm of bronchus and lung | 51   | 50.0  | 1.02 | (0.77-1.38) | 0.462 | 70     | 54.4   | 1.29 | (0.99-1.71) | 0.024 |
| [C40-C41] Bone and articular cartilage                      | 4    | 3.0   | 1.34 | (0.46-6.53) | 0.353 | 7      | 5.6    | 1.25 | (0.56-3.56) | 0.330 |
| [C43-C44] Skin                                              | 3    | 7.6   | 0.39 | (0.20-0.94) | 0.055 | 16     | 12.5   | 1.28 | (0.74-2.44) | 0.194 |
| [C45-C49] Mesothelial and soft tissue                       | 5    | 6.6   | 0.76 | (0.36-1.97) | 0.355 | 28     | 15.2   | 1.84 | (1.12-3.27) | 0.002 |
| [C50-C50] Breast                                            | 0    |       |      |             |       | 501    | 442.3  | 1.13 | (1.03-1.25) | 0.003 |
| [C51-C58] Female genital organs                             |      |       |      |             |       | 191    | 175.4  | 1.09 | (0.94-1.27) | 0.128 |
| [C60-C63] Male genital organs                               | 24   | 32.1  | 0.75 | (0.53-1.09) | 0.085 |        |        |      |             |       |
| [C64-C68] Urinary tract                                     | 40   | 45.3  | 0.88 | (0.66-1.21) | 0.242 | 30     | 25.6   | 1.17 | (0.80-1.80) | 0.216 |
| [C70-C72] Brain and other parts of central nervous system   | 8    | 9.5   | 0.84 | (0.45-1.80) | 0.392 | 16     | 17.7   | 0.90 | (0.57-1.53) | 0.402 |
| [C81-C96] Lymphoid, haematopoietic and related tissue       | 42   | 35.7  | 1.18 | (0.85-1.68) | 0.165 | 66     | 56.1   | 1.18 | (0.91-1.56) | 0.107 |
| (C82-C85) Non-Hodgkin's lymphoma                            | 21   | 16.2  | 1.3  | (0.80-2.26) | 0.143 | 28     | 24.4   | 1.15 | (0.77-1.78) | 0.258 |
| (C91-C95) Leukaemia                                         | 11   | 11.8  | 0.93 | (0.53-1.82) | 0.485 | 27     | 20.0   | 1.35 | (0.87-2.21) | 0.078 |

Obs, observed cases; Exp, expected cases; SIR: standardized incidence ratio; CI: confidence interval.

Those with  $P < 0.002$  (significant under Bonferroni correction) were in bold.

**Supplementary Table S3. Observed Number of Deaths, Standardized Incidence Ratio and 95% Confidence Interval, Public Officials as the Reference Group**

**(Dynamic cohort)**

| Cancer classification                                       | Male       |              |             |                    |                  | Female     |              |             |                    |                  |
|-------------------------------------------------------------|------------|--------------|-------------|--------------------|------------------|------------|--------------|-------------|--------------------|------------------|
|                                                             | Obs        | Exp          | SIR         | 95% CI             | P                | Obs        | Exp          | SIR         | 95% CI             | P                |
| All-cause death                                             | <b>252</b> | <b>188.9</b> | <b>1.33</b> | <b>(1.16-1.55)</b> | <b>&lt;0.001</b> | <b>281</b> | <b>212.3</b> | <b>1.32</b> | <b>(1.16-1.52)</b> | <b>&lt;0.001</b> |
| [C00-C97] Malignant neoplasm                                | 545        | 609.4        | 0.89        | (0.83-0.97)        | 0.004            | 2094       | 2216.1       | 0.94        | (0.91-0.99)        | 0.005            |
| [C00-C14] Lip, oral cavity and pharynx                      | 17         | 12.7         | 1.33        | (0.78-2.53)        | 0.144            | 19         | 13.0         | 1.46        | (0.85-2.74)        | 0.070            |
| [C15-C26] Digestive organs                                  | 288        | 295.2        | 0.98        | (0.87-1.10)        | 0.351            | 299        | 284.8        | 1.05        | (0.93-1.18)        | 0.207            |
| (C16) Stomach                                               | 109        | 114.2        | 0.95        | (0.79-1.16)        | 0.335            | 132        | 123.9        | 1.07        | (0.89-1.28)        | 0.245            |
| (C18) Colon                                                 | 51         | 47.6         | 1.07        | (0.81-1.45)        | 0.330            | 56         | 60.9         | 0.92        | (0.72-1.20)        | 0.291            |
| (C22) Liver and intrahepatic bile ducts                     | 51         | 61.3         | 0.83        | (0.65-1.09)        | 0.103            | 30         | 25.4         | 1.18        | (0.80-1.82)        | 0.205            |
| (C25) Pancreas                                              | 9          | 13.6         | 0.66        | (0.39-1.23)        | 0.130            | 17         | 16.8         | 1.01        | (0.63-1.74)        | 0.513            |
| [C30-C39] Respiratory and intrathoracic organs              | 60         | 49.0         | 1.22        | (0.93-1.65)        | 0.070            | 76         | 68.8         | 1.11        | (0.87-1.42)        | 0.208            |
| (C33-C34) Trachea & Malignant neoplasm of bronchus and lung | 51         | 41.7         | 1.22        | (0.90-1.70)        | 0.090            | 70         | 61.6         | 1.14        | (0.89-1.48)        | 0.157            |
| [C40-C41] Bone and articular cartilage                      | 4          | 2.6          | 1.54        | (0.49-8.78)        | 0.264            | 7          | 6.2          | 1.13        | (0.52-3.01)        | 0.426            |
| [C43-C44] Skin                                              | 3          | 7.4          | 0.41        | (0.20-0.98)        | 0.063            | 16         | 12.8         | 1.25        | (0.73-2.36)        | 0.219            |
| [C45-C49] Mesothelial and soft tissue                       | 5          | 7.2          | 0.7         | (0.34-1.72)        | 0.276            | 28         | 17.4         | 1.61        | (1.01-2.75)        | 0.012            |
| [C50-C50] Breast                                            | 0          |              |             |                    |                  | 501        | 533.0        | 0.94        | (0.86-1.03)        | 0.085            |
| [C51-C58] Female genital organs                             |            |              |             |                    |                  | 191        | 156.1        | 1.22        | (1.05-1.44)        | 0.004            |
| [C60-C63] Male genital organs                               | <b>24</b>  | <b>42.3</b>  | <b>0.57</b> | <b>(0.42-0.79)</b> | <b>0.0016</b>    |            |              |             |                    |                  |
| [C64-C68] Urinary tract                                     | 40         | 45.6         | 0.88        | (0.66-1.20)        | 0.228            | 30         | 26.6         | 1.13        | (0.77-1.72)        | 0.279            |
| [C70-C72] Brain and other parts of central nervous system   | 8          | 8.4          | 0.95        | (0.49-2.15)        | 0.537            | 16         | 21.6         | 0.74        | (0.49-1.19)        | 0.134            |
| [C81-C96] Lymphoid, haematopoietic and related tissue       | 42         | 35.3         | 1.19        | (0.86-1.71)        | 0.149            | 66         | 53.7         | 1.23        | (0.94-1.64)        | 0.057            |
| (C82-C85) Non-Hodgkin's lymphoma                            | 21         | 15.1         | 1.39        | (0.84-2.48)        | 0.087            | 28         | 22.4         | 1.25        | (0.83-1.98)        | 0.141            |
| (C91-C95) Leukaemia                                         | 11         | 12.0         | 0.92        | (0.53-1.78)        | 0.462            | 27         | 17.6         | 1.53        | (0.97-2.60)        | 0.022            |

Obs, observed cases; Exp, expected cases; SIR: standardized incidence ratio; CI: confidence interval.

Those with  $P < 0.002$  (significant under Bonferroni correction) were in bold.

**Supplementary Table S4. The summary of significant findings in this study**

| Classification                                                         | Male HHCWs       |      |             | Female HHCWs     |      |             |
|------------------------------------------------------------------------|------------------|------|-------------|------------------|------|-------------|
|                                                                        | Control group    | SIR  | 95% CI      | Control group    | SIR  | 95% CI      |
| <i>All-cause death</i>                                                 | Public officials | 1.50 | (1.25-1.80) | Total worker     | 1.25 | (1.06-1.47) |
|                                                                        |                  |      |             | Public officials | 1.62 | (1.36-1.96) |
| <i>[C00-C97] Malignant neoplasm</i>                                    | Public officials | 1.15 | (1.05-1.28) | Total worker     | 1.09 | (1.03-1.15) |
|                                                                        |                  |      |             | Public officials | 1.15 | (1.09-1.22) |
| <i>[C15-C26] Digestive organs</i>                                      | Public officials | 1.30 | (1.13-1.51) | Public officials | 1.34 | (1.15-1.58) |
| <i>[C30-C39] Respiratory and intrathoracic organs</i>                  | Public officials | 1.84 | (1.29-2.72) |                  |      |             |
| <i>(C33-C34) Trachea &amp; Malignant neoplasm of bronchus and lung</i> | Public officials | 1.84 | (1.25-2.81) |                  |      |             |
| <i>[C45-C49] Mesothelial and soft tissue</i>                           |                  |      |             | Public officials | 2.19 | (1.16-4.75) |
| <i>[C50-C50] Breast</i>                                                |                  |      |             | Total worker     | 1.21 | (1.09-1.36) |
|                                                                        |                  |      |             | Public officials | 1.18 | (1.06-1.32) |
| <i>[C51-C58] Female genital organs</i>                                 |                  |      |             | Public officials | 1.49 | (1.21-1.85) |
| <i>[C60-C63] Male genital organs</i>                                   | Public officials | 0.57 | (0.42-0.79) |                  |      |             |
| <i>(C82-C85) Non-Hodgkin's lymphoma</i>                                | Public officials | 2.19 | (1.14-4.89) |                  |      |             |

HHCW, healthcare workers in hospital; SIR, standardized incidence ratio; CI, confidence interval  
The “Fixed” job definition of HHCWs and control groups were based on participants’ workplace for at least three consecutive years from 2007 to 2015

Those with  $P < 0.002$  were regarded as significant under Bonferroni correction.
